# Supplementary material for: Flame Retardancy of Short Flax Fibers Modified by Radiation-Induced Grafting of Phosphonated Monomers: Comparison between Pre- and Simultaneous Irradiation Grafting
Source: MDPI journal article supplement (doi:10.3390/molecules29051176), 2024-03-06
Supplement: s1 [file s1]

## Supporting information

**Table S1.** Target dose and corresponding measured dose for pre-irradiation.

|                                       |     |      |      |      |       |
|---------------------------------------|-----|------|------|------|-------|
| Target dose (kGy)                     | 10  | 20   | 50   | 75   | 100   |
| Measured dose (e-Beam) (kGy)          | 9.7 | 19.4 | 47.6 | 67.8 | 95.0  |
| Measured dose ( $\gamma$ -rays) (kGy) | 11  | 23.5 | 54.2 | 82.9 | 108.1 |

**Table S2.** Target dose and corresponding measured dose for simultaneous irradiation.

|                                       |      |      |      |      |       |
|---------------------------------------|------|------|------|------|-------|
| Target dose (kGy)                     | 10   | 20   | 50   | 75   | 100   |
| Measured dose (e-Beam) (kGy)          | 11.5 | 23.3 | 54.2 | 84.8 | 100   |
| Measured dose ( $\gamma$ -rays) (kGy) | 10   | 19   | 50.3 | 98.4 | 119.8 |

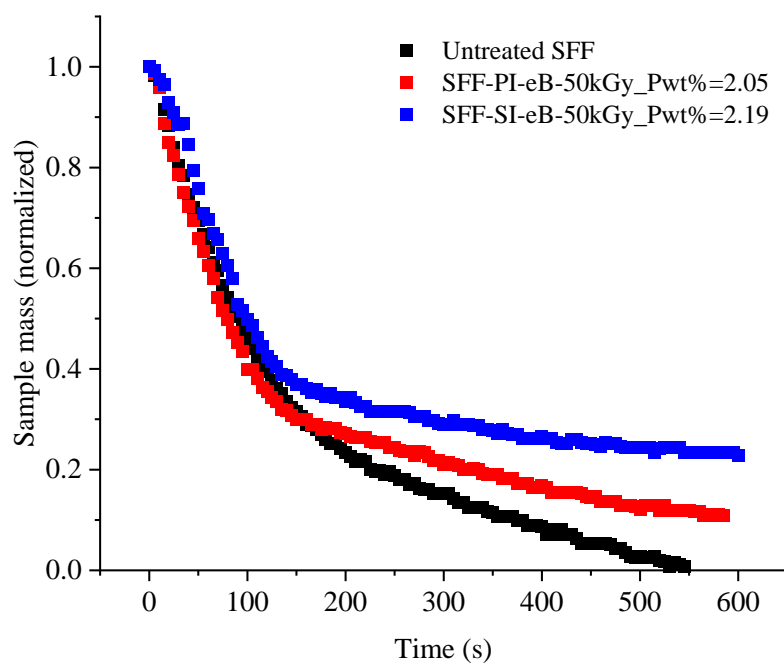

**Figure S1.** Sample mass versus time during cone calorimetry testing.

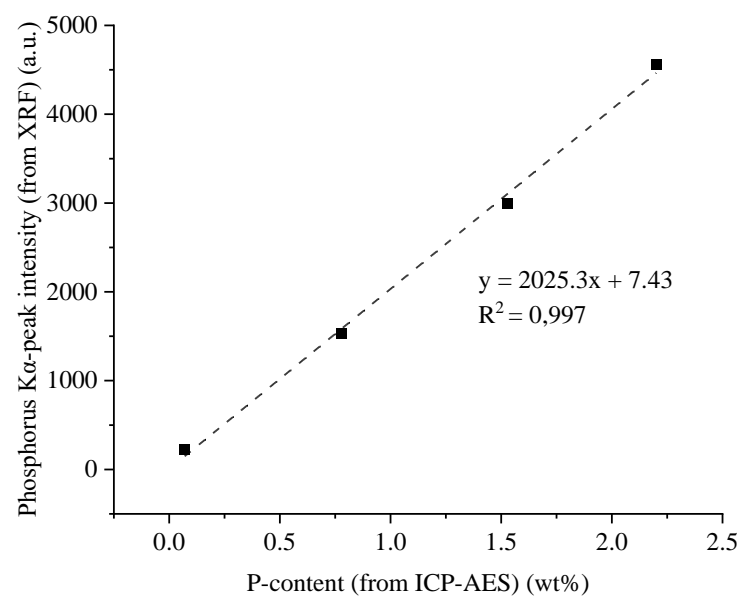

**Figure S2.** Calibration curve used to measure P-content of treated SFF with XRF.
